# Supplementary material for: Modelling groundwater recharge, actual evaporation, and transpiration in semi-arid sites of the Lake Chad basin: the role of soil and vegetation in groundwater recharge
Source: Copernicus journal article supplement (doi:10.5194/hess-27-3601-2023), 2023-10-12
Supplement: Supplementary file 1 [file hess-27-3601-2023-supplement.pdf]

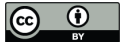

*Supplement of*

**Modelling groundwater recharge, actual evaporation, and transpiration in semi-arid sites of the Lake Chad basin: the role of soil and vegetation in groundwater recharge**

**Christoph Neukum et al.**

*Correspondence to:* Christoph Neukum ([christoph.neukum@bgr.de](mailto:christoph.neukum@bgr.de))

The copyright of individual parts of the supplement might differ from the article licence.

Table S1: Precipitation chloride concentration measured in N'Djamena.

| Sampling Date | Precipitation amount<br>(mm) | Chloride concentration<br>(mg l <sup>-1</sup> ) |
|---------------|------------------------------|-------------------------------------------------|
| 16/06/2016    | 19                           | 1.25                                            |
| 17/06/2016    | 17                           | 0.82                                            |
| 26/06/2016    | 20                           | 0.37                                            |
| 12/07/2016    | 55                           | 0.13                                            |
| 25/07/2016    | 0.5                          | 0.37                                            |
| 01/08/2016    | 51                           | 0.29                                            |
| 07/08/2016    | 13.5                         | 0.17                                            |
| 10/08/2016    | 23                           | 0.22                                            |
| 24/08/2016    | 29                           | 0.22                                            |
| 01/09/2016    | 36                           | 0.20                                            |
| 24/05/2017    | 1                            | 19.60                                           |
| 30/05/2017    | 4                            | 3.40                                            |
| 10/06/2017    | 1                            | 3.24                                            |
| 12/06/2017    | 12                           | 0.82                                            |
| 21/06/2017    | 33                           | 1.45                                            |
| 22/06/2017    | 8                            | 1.12                                            |
| 27/06/2017    | 11                           | 0.97                                            |
| 30/06/2017    | 6                            | 0.53                                            |
| 05/07/2017    | 40                           | 0.39                                            |
| 08/07/2017    | 30                           | 0.17                                            |
| 17/07/2017    | 24                           | 0.19                                            |
| 24/07/2017    | 65                           | 0.15                                            |
| 09/08/2017    | 55                           | 0.15                                            |
| 15/08/2017    | 23                           | 0.28                                            |
| 18/08/2017    | 40                           | 0.17                                            |
| 14/09/2017    | 29                           | 0.31                                            |
| 25/09/2017    | 31                           | 0.43                                            |
| 28/05/2018    | 28                           | 0.91                                            |
| 01/07/2018    | 60                           | 0.16                                            |
| 07/07/2018    | 65                           | 0.11                                            |
| 11/07/2018    | 46                           | 0.16                                            |
| 13/07/2018    | 43                           | 0.38                                            |
| 30/07/2018    | 50                           | 0.09                                            |
| 08/08/2018    | 50                           | 0.13                                            |
| 23/08/2018    | 80                           | 0.05                                            |
| 07/09/2018    | 30                           | 0.13                                            |
| 28/05/2019    | 45                           | 1.89                                            |
| 30/05/2019    | 30                           | 0.37                                            |
| 22/07/2019    | 121                          | 0.17                                            |
| 05/08/2019    | 29                           | 0.09                                            |
| 09/08/2019    | 45                           | 0.08                                            |
| 27/08/2019    | 35                           | 0.25                                            |
| 09/09/2019    | 45                           | 0.46                                            |
| 15/09/2019    | 43                           | 0.37                                            |
| 01/10/2019    | 36                           | 0.55                                            |
| 04/10/2019    | 14                           | 0.46                                            |

| Sampling Date | Precipitation amount<br>(mm) | Chloride concentration<br>(mg l <sup>-1</sup> ) |
|---------------|------------------------------|-------------------------------------------------|
| 07/10/2019    | 20                           | 0.27                                            |
| 04/05/2020    | 19.3                         | 1.35                                            |
| 05/06/2020    | 15.9                         | 1.30                                            |
| 09/06/2020    | 21.4                         | 0.69                                            |
| 15/06/2020    | 26.5                         | 0.29                                            |
| 19/06/2020    | 12                           | 0.30                                            |
| 26/06/2020    | 14.4                         | 0.85                                            |
| 05/07/2020    | 26.5                         | 0.21                                            |
| 10/07/2020    | 27.4                         | 0.18                                            |
| 14/07/2020    | 9.4                          | 0.26                                            |
| 22/07/2020    | 13.2                         | 0.16                                            |
| 24/07/2020    | 16.6                         | 0.12                                            |
| 27/07/2020    | 24.6                         | 0.15                                            |

Table S2: Soil chloride concentration measured in each of the Salamat profiles. GW (2016): chloride concentration in groundwater and year of measurement.

| Site    | Depth interval<br>(cm) | Soil chloride concentration (mg l <sup>-1</sup> ) |       | Gravimetric water content (%) |      |
|---------|------------------------|---------------------------------------------------|-------|-------------------------------|------|
|         |                        | 2016                                              | 2019  | 2016                          | 2019 |
| ST1     | 0-10                   | 44.75                                             | 11.17 | 0.17                          | 0.31 |
|         | 10-20                  | 42.14                                             | 15.05 | 0.18                          | 0.18 |
|         | 20-30                  | 45.55                                             | 9.75  | 0.16                          | 0.16 |
|         | 30-40                  | 29.40                                             | 7.07  | 0.28                          | 0.20 |
|         | 40-50                  | 13.53                                             | 6.26  | 0.33                          | 0.21 |
|         | 50-60                  | 32.15                                             | 3.82  | 0.34                          | 0.23 |
|         | 60-80                  | 18.54                                             | 2.78  | 0.33                          | 0.24 |
|         | 80-100                 | 12.26                                             | 2.64  | 0.28                          | 0.24 |
|         | 100-110                | 14.55                                             | 2.12  | 0.29                          | 0.25 |
|         | 110-120                | 24.89                                             |       | 0.29                          |      |
|         | 120-130                | 29.28                                             | 1.72  | 0.28                          | 0.23 |
|         | 130-140                | 18.57                                             |       | 0.27                          |      |
|         | 140-150                | 24.00                                             | 1.74  | 0.25                          | 0.23 |
|         | 150-160                | 55.14                                             |       | 0.27                          |      |
|         | 160-170                | 51.84                                             | 1.91  | 0.22                          | 0.23 |
|         | 170-180                | 24.65                                             |       | 0.25                          |      |
|         | 180-190                | 40.14                                             | 2.25  | 0.23                          | 0.20 |
|         | 190-200                | 28.30                                             |       | 0.22                          |      |
|         | 200-210                | 42.37                                             | 15.5  | 0.22                          | 0.20 |
|         | 210-220                | 10.07                                             |       | 0.21                          |      |
|         | 220-230                | 26.71                                             | 1.47  | 0.21                          | 0.18 |
|         | 230-240                | 24.25                                             |       | 0.22                          |      |
|         | 240-260                |                                                   | 1.75  |                               | 0.16 |
|         | 260-280                |                                                   | 1.42  |                               | 0.17 |
|         | 280-300                |                                                   | 1.26  |                               | 0.16 |
|         | 300-320                |                                                   | 1.10  |                               | 0.16 |
| 320-340 |                        | 1.76                                              |       | 0.16                          |      |
| 340-360 |                        | 2.23                                              |       | 0.14                          |      |
| 360-380 |                        | 1.14                                              |       | 0.16                          |      |

| Site      | Depth interval (cm) | Soil chloride concentration (mg l <sup>-1</sup> ) |        | Gravimetric water content (%) |      |
|-----------|---------------------|---------------------------------------------------|--------|-------------------------------|------|
|           |                     | 2016                                              | 2019   | 2016                          | 2019 |
|           | 380-400             |                                                   | 0.99   |                               | 0.16 |
|           | 400-420             |                                                   | 1.41   |                               | 0.16 |
|           | 420-440             |                                                   | 1.35   |                               | 0.15 |
|           | 440-460             |                                                   | 1.38   |                               | 0.16 |
|           | 460-480             |                                                   | 1.08   |                               | 0.17 |
|           | 480-500             |                                                   | 1.02   |                               | 0.18 |
| GW (2019) | 1,100               | 0.34                                              |        |                               |      |
| ST2       | 0-10                | 269.66                                            | 21.07  | 0.03                          | 0.25 |
|           | 10-20               | 115.31                                            | 34.16  | 0.04                          | 0.22 |
|           | 20-30               | 82.18                                             | 134.77 | 0.05                          | 0.18 |
|           | 30-40               | 60.80                                             | 121.60 | 0.06                          | 0.07 |
|           | 40-50               | 98.79                                             | 40.65  | 0.09                          | 0.08 |
|           | 50-60               | 194.90                                            | 24.57  | 0.09                          | 0.09 |
|           | 60-70               | 210.85                                            | 28.27  | 0.06                          | 0.08 |
|           | 70-80               | 46.03                                             |        | 0.06                          |      |
|           | 80-90               | 30.47                                             | 69.27  | 0.08                          | 0.09 |
|           | 90-100              | 36.89                                             |        | 0.08                          |      |
|           | 100-110             | 37.52                                             | 160.93 | 0.08                          | 0.10 |
|           | 110-120             | 144.63                                            |        | 0.05                          |      |
|           | 120-130             | 258.28                                            | 202.94 | 0.07                          | 0.15 |
|           | 130-140             | 233.81                                            |        | 0.17                          |      |
|           | 140-150             | 304.90                                            | 206.61 | 0.16                          | 0.20 |
|           | 150-160             | 368.07                                            |        | 0.12                          |      |
|           | 160-170             | 207.07                                            | 186.64 | 0.12                          | 0.18 |
|           | 170-180             | 158.34                                            |        | 0.13                          |      |
|           | 180-190             | 191.84                                            | 146.81 | 0.12                          | 0.14 |
|           | 190-200             | 201.77                                            |        | 0.12                          |      |
|           | 200-220             |                                                   | 117.61 |                               | 0.14 |
|           | 220-240             |                                                   | 82.31  |                               | 0.14 |
|           | 240-260             |                                                   | 65.10  |                               | 0.13 |
|           | 260-280             |                                                   | 48.25  |                               | 0.13 |
|           | 280-300             |                                                   | 32.34  |                               | 0.12 |
|           | 300-320             |                                                   | 25.89  |                               | 0.12 |
|           | 320-340             |                                                   | 27.25  |                               | 0.12 |
|           | 340-360             |                                                   | 26.81  |                               | 0.12 |
|           | 360-380             |                                                   | 41.14  |                               | 0.13 |
|           | 380-400             |                                                   | 49.37  |                               | 0.14 |
|           | 400-420             |                                                   | 53.52  |                               | 0.14 |
|           | 420-440             |                                                   | 56.65  |                               | 0.14 |
|           | 440-460             |                                                   | 55.76  |                               | 0.10 |
|           | 460-480             |                                                   | 101.40 |                               | 0.01 |
|           | 480-500             |                                                   | 149.20 |                               | 0.01 |
| GW (2016) | 1,700               | 1.39                                              |        |                               |      |
| ST3       | 0-10                | 172.79                                            | 9.27   | 0.01                          | 0.09 |
|           | 10-20               | 73.81                                             | 15.44  | 0.02                          | 0.08 |
|           | 20-30               | 45.54                                             | 18.40  | 0.02                          | 0.07 |
|           | 30-40               | 37.08                                             | 8.65   | 0.03                          | 0.06 |
|           | 40-50               | 25.53                                             | 13.64  | 0.04                          | 0.05 |
|           | 50-60               | 10.71                                             | 6.38   | 0.08                          | 0.05 |

| Site      | Depth interval (cm) | Soil chloride concentration (mg l <sup>-1</sup> ) |       | Gravimetric water content (%) |      |
|-----------|---------------------|---------------------------------------------------|-------|-------------------------------|------|
|           |                     | 2016                                              | 2019  | 2016                          | 2019 |
|           | 60-70               | 41.26                                             |       | 0.05                          |      |
|           | 70-80               | 23.95                                             | 7.62  | 0.06                          | 0.05 |
|           | 80-90               | 30.15                                             |       | 0.07                          |      |
|           | 90-100              | 15.67                                             | 6.12  | 0.08                          | 0.07 |
|           | 100-110             | 11.67                                             |       | 0.09                          |      |
|           | 110-120             | 21.20                                             | 4.06  | 0.09                          | 0.07 |
|           | 120-130             | 54.53                                             |       | 0.10                          |      |
|           | 130-140             | 19.90                                             | 6.48  | 0.10                          | 0.06 |
|           | 140-150             | 12.27                                             |       | 0.10                          |      |
|           | 150-160             | 13.14                                             | 7.03  | 0.07                          | 0.04 |
|           | 160-170             | 16.54                                             |       | 0.05                          |      |
|           | 170-180             | 15.62                                             | 11.41 | 0.04                          | 0.04 |
|           | 180-190             | 15.96                                             |       | 0.05                          |      |
|           | 190-200             | 14.55                                             | 10.19 | 0.07                          | 0.03 |
|           | 200-210             | 7.40                                              |       | 0.08                          |      |
|           | 210-220             | 14.77                                             | 8.93  | 0.10                          | 0.08 |
|           | 220-230             | 12.77                                             |       | 0.12                          |      |
|           | 230-240             | 22.53                                             | 15.25 | 0.07                          | 0.03 |
|           | 240-250             | 101.22                                            |       | 0.03                          |      |
|           | 250-260             | 80.82                                             | 7.08  | 0.03                          | 0.03 |
|           | 260-270             | 171.44                                            |       | 0.02                          |      |
|           | 270-280             | 66.03                                             | 18.41 | 0.03                          | 0.02 |
|           | 280-300             | 88.52                                             | 11.64 | 0.02                          | 0.02 |
|           | 300-320             |                                                   | 28.13 |                               | 0.02 |
|           | 320-340             |                                                   | 24.83 |                               | 0.01 |
|           | 340-360             |                                                   | 37.71 |                               | 0.01 |
|           | 360-380             |                                                   | 30.59 |                               | 0.02 |
|           | 380-400             |                                                   | 29.21 |                               | 0.02 |
|           | 400-420             |                                                   | 32.63 |                               | 0.02 |
|           | 420-440             |                                                   | 36.39 |                               | 0.02 |
|           | 440-460             |                                                   |       |                               |      |
|           | 460-480             |                                                   | 39.34 |                               | 0.02 |
|           | 480-500             |                                                   | 39.51 |                               | 0.02 |
| GW (2016) | 2,100               | 4.10                                              |       |                               |      |

Table S3: Soil chloride concentration measured in each of the Waza Logone profiles in 2017. GW (2016): chloride concentration in groundwater and year of measurement.

| Site | Depth interval (cm) | Soil chloride concentration (mg l <sup>-1</sup> ) | Gravimetric water content (%) |
|------|---------------------|---------------------------------------------------|-------------------------------|
| WL1  | 0-10                | 246.74                                            | 0.12                          |
|      | 10-20               | 142.34                                            | 0.13                          |
|      | 20-30               | 39.42                                             | 0.12                          |
|      | 30-40               | 17.99                                             | 0.11                          |
|      | 40-50               | 18.03                                             | 0.07                          |
|      | 50-60               | 26.61                                             | 0.08                          |
|      | 60-70               | 9.44                                              | 0.11                          |
|      | 70-80               | 4.36                                              | 0.13                          |
|      | 80-90               | 8.31                                              | 0.15                          |

| Site      | Depth interval<br>(cm) | Soil chloride<br>concentration (mg l <sup>-1</sup> ) | Gravimetric water<br>content (%) |
|-----------|------------------------|------------------------------------------------------|----------------------------------|
|           | 90-100                 | 11.22                                                | 0.18                             |
|           | 100-120                | 7.33                                                 | 0.16                             |
|           | 120-140                | 4.26                                                 | 0.15                             |
|           | 140-160                | 3.65                                                 | 0.16                             |
|           | 160-180                | 12.24                                                | 0.18                             |
|           | 180-200                | 3.11                                                 | 0.19                             |
|           | 200-220                | 3.00                                                 | 0.14                             |
|           | 220-240                | 7.18                                                 | 0.11                             |
|           | 240-260                | 22.38                                                | 0.15                             |
|           | 260-280                | 18.40                                                | 0.14                             |
|           | 280-300                | 17.46                                                | 0.16                             |
|           | 300-320                | 16.14                                                | 0.17                             |
|           | 320-340                | 46.94                                                | 0.18                             |
|           | 340-360                | 24.16                                                | 0.17                             |
|           | 360-380                | 75.87                                                | 0.15                             |
|           | 380-400                | 6.86                                                 | 0.15                             |
| GW (2017) | 400                    | 0.23                                                 |                                  |
| WL2       | 0-10                   | 446.21                                               | 0.03                             |
|           | 10-20                  | 269.74                                               | 0.02                             |
|           | 20-30                  | 106.04                                               | 0.04                             |
|           | 30-40                  | 35.22                                                | 0.06                             |
|           | 40-50                  | 44.11                                                | 0.06                             |
|           | 50-60                  | 19.47                                                | 0.07                             |
|           | 60-80                  | 18.40                                                | 0.08                             |
|           | 80-100                 | 17.55                                                | 0.07                             |
|           | 100-120                | 15.36                                                | 0.06                             |
|           | 120-140                | 12.12                                                | 0.07                             |
|           | 140-160                | 101.76                                               | 0.07                             |
|           | 160-180                | 15.07                                                | 0.08                             |
|           | 180-200                | 5.86                                                 | 0.09                             |
|           | 200-220                | 4.90                                                 | 0.09                             |
|           | 220-240                | 3.85                                                 | 0.09                             |
|           | 240-260                | 2.69                                                 | 0.09                             |
|           | 260-280                | 2.73                                                 | 0.10                             |
|           | 280-300                | 4.87                                                 | 0.10                             |
| GW (2014) | 1,200                  | 0.90                                                 |                                  |
| WL3       | 0-10                   | 157.35                                               | 0.06                             |
|           | 10-20                  | 50.59                                                | 0.09                             |
|           | 20-30                  | 13.32                                                | 0.11                             |
|           | 30-40                  | 32.41                                                | 0.11                             |
|           | 40-50                  | 14.77                                                | 0.11                             |
|           | 50-60                  | 9.02                                                 | 0.12                             |
|           | 60-80                  | 8.85                                                 | 0.12                             |
|           | 80-100                 | 10.27                                                | 0.13                             |
|           | 100-120                | 6.84                                                 | 0.13                             |
|           | 120-140                | 6.28                                                 | 0.13                             |
|           | 140-160                | 5.59                                                 | 0.15                             |
|           | 160-180                | 7.63                                                 | 0.20                             |
|           | 180-200                | 11.47                                                | 0.21                             |
|           | 200-220                | 4.83                                                 | 0.19                             |

| Site      | Depth interval<br>(cm) | Soil chloride<br>concentration (mg l <sup>-1</sup> ) | Gravimetric water<br>content (%) |
|-----------|------------------------|------------------------------------------------------|----------------------------------|
|           | 220-240                | 5.30                                                 | 0.19                             |
|           | 240-260                | 4.74                                                 | 0.21                             |
|           | 260-280                | 4.98                                                 | 0.22                             |
|           | 280-300                | 9.54                                                 | 0.23                             |
|           | 300-320                | 10.24                                                | 0.21                             |
|           | 320-340                | 9.75                                                 | 0.22                             |
|           | 340-360                | 9.25                                                 | 0.23                             |
|           | 360-380                | 21.78                                                | 0.17                             |
| GW (2017) | 360                    | 1.51                                                 |                                  |

Table S4: Site-specific estimated monthly variation of ground cover including grass, crops, and flooding periods with ranges of monthly basal crop coefficient ( $K_{cb}$ ), soil water evaporation coefficient ( $K_e$ ), and root depth used in the scenarios.

| Location | Month | Vegetation    | Kcb         | Ke          | Root depth (m)                      |
|----------|-------|---------------|-------------|-------------|-------------------------------------|
| ST1      | Jan   | Sorghum       | 1.01 – 0.86 | 0.12        | 1.5 – 2.5                           |
|          | Feb   | Sorghum       | 0.35 – 0.35 | 0.48        | 1.5 – 2.5                           |
|          | Mar   | Bare soil     | 0.0         | 0.47 – 0.68 | 0.0                                 |
|          | Apr   | Bare soil     | 0.0         | 0.27 – 0.41 | 0.0                                 |
|          | May   | Grass         | 0.6 – 0.4   | 0.1 – 0.12  | 0.1 – 0.5                           |
|          | June  | Grass         | 0.85 – 0.6  | 0.05        | 0.2 – 0.7                           |
|          | July  | Grass         | 1.03 – 0.83 | 0.12        | 0.2 – 0.7                           |
|          | Aug   | Flooded       | 0.3 – 0.2   | 0.9 – 1.0   | 0.2 – 0.7                           |
|          | Sep   | Flooded       | 0.0         | 1.08        | 0.0                                 |
|          | Oct   | Flooded       | 0.0         | 1.08        | 0.0                                 |
|          | Nov   | Sorghum       | 0.2 – 0.1   | 0.66        | 0.5 – 1.5                           |
|          | Dec   | Sorghum       | 1.01 – 0.86 | 0.12        | 1.5 – 2.5                           |
| ST2      | Jan   | Tree (Acacia) | 0.5 – 0.8   | 0.2 – 0.34  | Time invariant<br>root distribution |
|          | Feb   | Tree          | 0.2 – 0.6   | 0.17 – 0.39 |                                     |
|          | Mar   | Tree          | 0.1 – 0.3   | 0.07 – 0.37 |                                     |
|          | Apr   | Tree          | 0.1 – 0.3   | 0.02 – 0.17 |                                     |
|          | May   | Tree, Grass   | 0.1 – 0.3   | 0.5         |                                     |
|          | June  | Tree, Grass   | 0.3 – 0.4   | 0.5         |                                     |
|          | July  | Tree, Grass   | 0.3 – 0.4   | 0.5         |                                     |
|          | Aug   | Tree, flooded | 0.6 – 0.8   | 0.25        |                                     |
|          | Sep   | Tree, flooded | 0.7 – 1.05  | 0.25        |                                     |
|          | Oct   | Tree, flooded | 0.7 – 1.05  | 0.25        |                                     |
|          | Nov   | Tree, Grass   | 0.7 – 0.9   | 0.25        |                                     |
|          | Dec   | Tree          | 0.5 – 0.8   | 0.32 – 0.37 |                                     |
| ST3      | Jan   | Grass         | 0.05 – 0.1  | 0.13 – 0.39 | 0.1                                 |
|          | Feb   | Dry Grass     | 0.0 – 0.05  | 0.04 – 0.13 | 0.1                                 |
|          | Mar   | Dry Grass     | 0.0 – 0.05  | 0.0         | 0.1 – 0.2                           |
|          | Apr   | Grass         | 0.1 – 0.3   | 0.0         | 0.2 – 0.3                           |
|          | May   | Green grass   | 0.6         | 0.0         | 0.2 – 0.3                           |
|          | June  | Green grass   | 0.65 – 0.85 | 0.34 – 0.54 | 0.2 – 0.4                           |
|          | July  | Green grass   | 0.73 – 1.03 | 0.16 – 0.24 | 0.2 – 0.4                           |
|          | Aug   | Green grass   | 0.83 – 1.03 | 0.09 – 0.22 | 0.2 – 0.4                           |
|          | Sep   | Green grass   | 0.83 – 0.98 | 0.14 – 0.22 | 0.2 – 0.4                           |
|          | Oct   | Green grass   | 0.78 – 0.93 | 0.19 – 0.22 | 0.2 – 0.3                           |

| Location | Month | Vegetation  | Kcb         | Ke          | Root depth (m) |
|----------|-------|-------------|-------------|-------------|----------------|
|          | Nov   | Green grass | 0.4 – 0.6   | 0.51        | 0.1 – 0.3      |
|          | Dec   | Grass       | 0.05 – 0.1  | 0.4 – 0.67  | 0.1            |
| WL1      | Jan   | Bare soil   | 0.0 – 0.1   | 0.29 – 0.63 | 0.0 – 0.2      |
|          | Feb   | Bare soil   | 0.0 – 0.1   | 0.16 – 0.42 | 0.0 – 0.2      |
|          | Mar   | Bare soil   | 0.10        | 0.07 – 0.25 | 0.05 – 0.3     |
|          | Apr   | Grass       | 0.30 – 0.4  | 0.03 – 0.1  | 0.1 – 0.3      |
|          | May   | Grass       | 0.40        | 0.02 – 0.08 | 0.1 – 0.5      |
|          | June  | Grass       | 0.70 – 0.9  | 0.01 – 0.02 | 0.1 – 0.5      |
|          | July  | Grass       | 0.89 – 1.09 | 0.13        | 0.1 – 0.5      |
|          | Aug   | Flooded     | 0.1 – 0.2   | 0.92 - 1.01 | 0.1 – 0.4      |
|          | Sep   | Flooded     | 0.1 – 0.2   | 0.92 - 1.01 | 0.0 – 0.1      |
|          | Oct   | Flooded     | 0.1 – 0.2   | 0.92 - 1.01 | 0.0 – 0.1      |
|          | Nov   | Grass       | 0.2 – 0.5   | 0.58 – 0.62 | 0.05 – 0.2     |
|          | Dec   | Grass       | 0.2 – 0.4   | 0.37 – 0.57 | 0.05 – 0.2     |
| WL2      | Jan   | Bare soil   | 0.0 – 0.1   | 0.11 – 0.57 | 0.0 – 0.1      |
|          | Feb   | Bare soil   | 0.0 – 0.1   | 0.03 – 0.24 | 0.0 – 0.1      |
|          | Mar   | Bare soil   | 0.1 – 0.2   | 0.0 – 0.07  | 0.05 – 0.1     |
|          | Apr   | Grass       | 0.2 – 0.3   | 0.0 – 0.02  | 0.05 – 0.2     |
|          | May   | Grass       | 0.4 – 0.4   | 0.0 – 0.01  | 0.15 – 0.3     |
|          | June  | Grass       | 0.45 – 0.6  | 0.0         | 0.15 – 0.3     |
|          | July  | Grass       | 0.5 – 0.7   | 0.55 - 0.75 | 0.15 – 0.3     |
|          | Aug   | Grass       | 0.45 – 1.0  | 0.12 - 0.22 | 0.1 – 0.3      |
|          | Sep   | Flooded     | 0.3 – 1.0   | 0.12 - 0.22 | 0.1 – 0.3      |
|          | Oct   | Grass       | 0.2 – 0.7   | 0.42 - 0.67 | 0.15 – 0.2     |
|          | Nov   | Grass       | 0.1 – 0.2   | 0.77        | 0.15 – 0.2     |
|          | Dec   | Grass       | 0.0 – 0.1   | 0.32 – 0.9  | 0.05 – 0.1     |
| WL3      | Jan   | Bare soil   | 0.0 – 0.1   | 0.28 – 0.6  | 0.1 – 0.2      |
|          | Feb   | Bare soil   | 0.0 – 0.1   | 0.15 – 0.4  | 0.1 – 0.2      |
|          | Mar   | Bare soil   | 0.1 – 0.1   | 0.06 – 0.23 | 0.1 – 0.5      |
|          | Apr   | Grass       | 0.2 – 0.4   | 0.03 – 0.09 | 0.2 – 0.5      |
|          | May   | Grass       | 0.4         | 0.01 – 0.08 | 0.2 – 0.6      |
|          | June  | Grass       | 0.4 – 0.9   | 0.01 - 0.01 | 0.2 – 0.6      |
|          | July  | Grass       | 0.79 – 1.09 | 0.13        | 0.2 – 0.6      |
|          | Aug   | Flooded     | 0.1 – 0.2   | 0.92 - 1.01 | 0.2 – 0.6      |
|          | Sep   | Flooded     | 0.0 – 0.1   | 1.01        | 0.2 – 0.6      |
|          | Oct   | Flooded     | 0.0 – 0.1   | 1.01        | 0.2 – 0.5      |
|          | Nov   | Grass       | 0.2 – 0.5   | 0.58        | 0.1 – 0.5      |
|          | Dec   | Grass       | 0.1 – 0.4   | 0.1 - 0.41  | 0.1 – 0.2      |



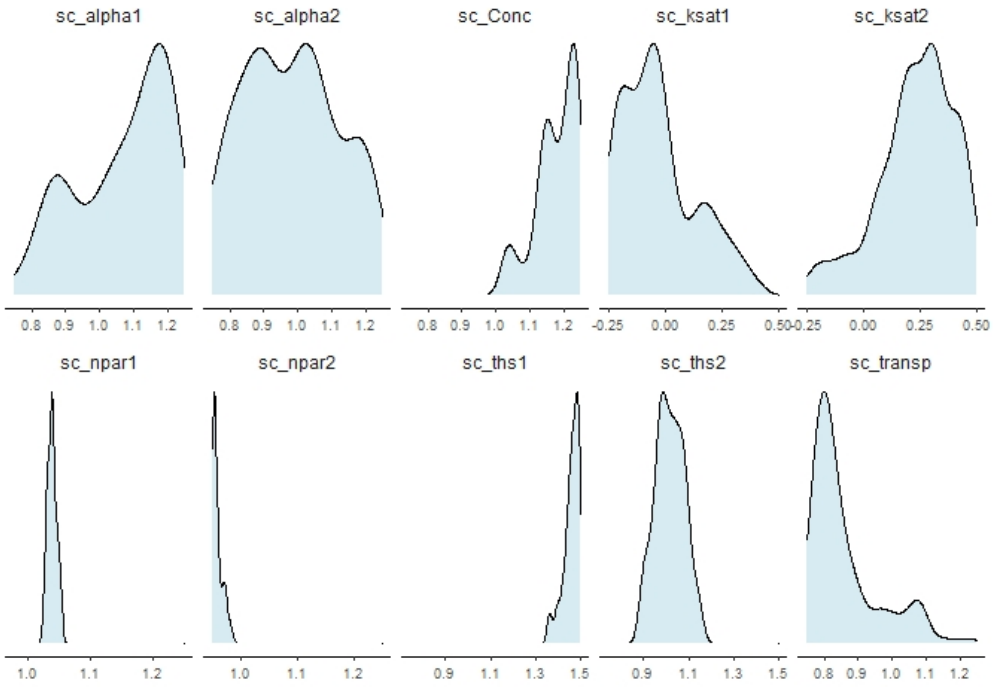

Fig. S1: posterior density distributions of the scaling factors used in the calibration of model ST1. Numbers indicate the individual model layers. Range of x-axes corresponds to prior distribution (parameter alpha of the Mualem-van Genuchten equation: sc\_alpha1. sc\_alpha2: alpha; sc\_Conc: input chloride concentration; sc\_ksat1. sc\_ksat2: saturated hydraulic conductivity; sc\_npar1. sc\_npar2: parameter n of the Mualem-van Genuchten equation ; sc\_ths1. sc\_ths2: saturated water content; sc\_transp: transpiration fraction in the evapotranspiration; 1: upper layer; 2: lower layer).

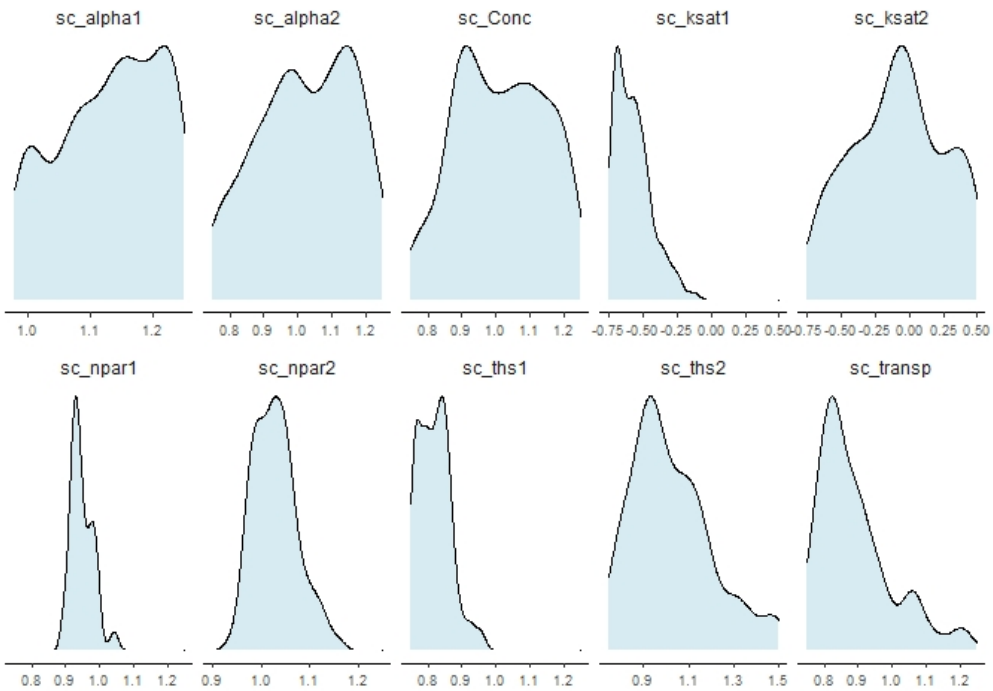

Fig. S2: posterior density distributions of the scaling factors used in the calibration of model ST2. Numbers indicate the individual model layers. Range of x-axes corresponds to prior distribution.

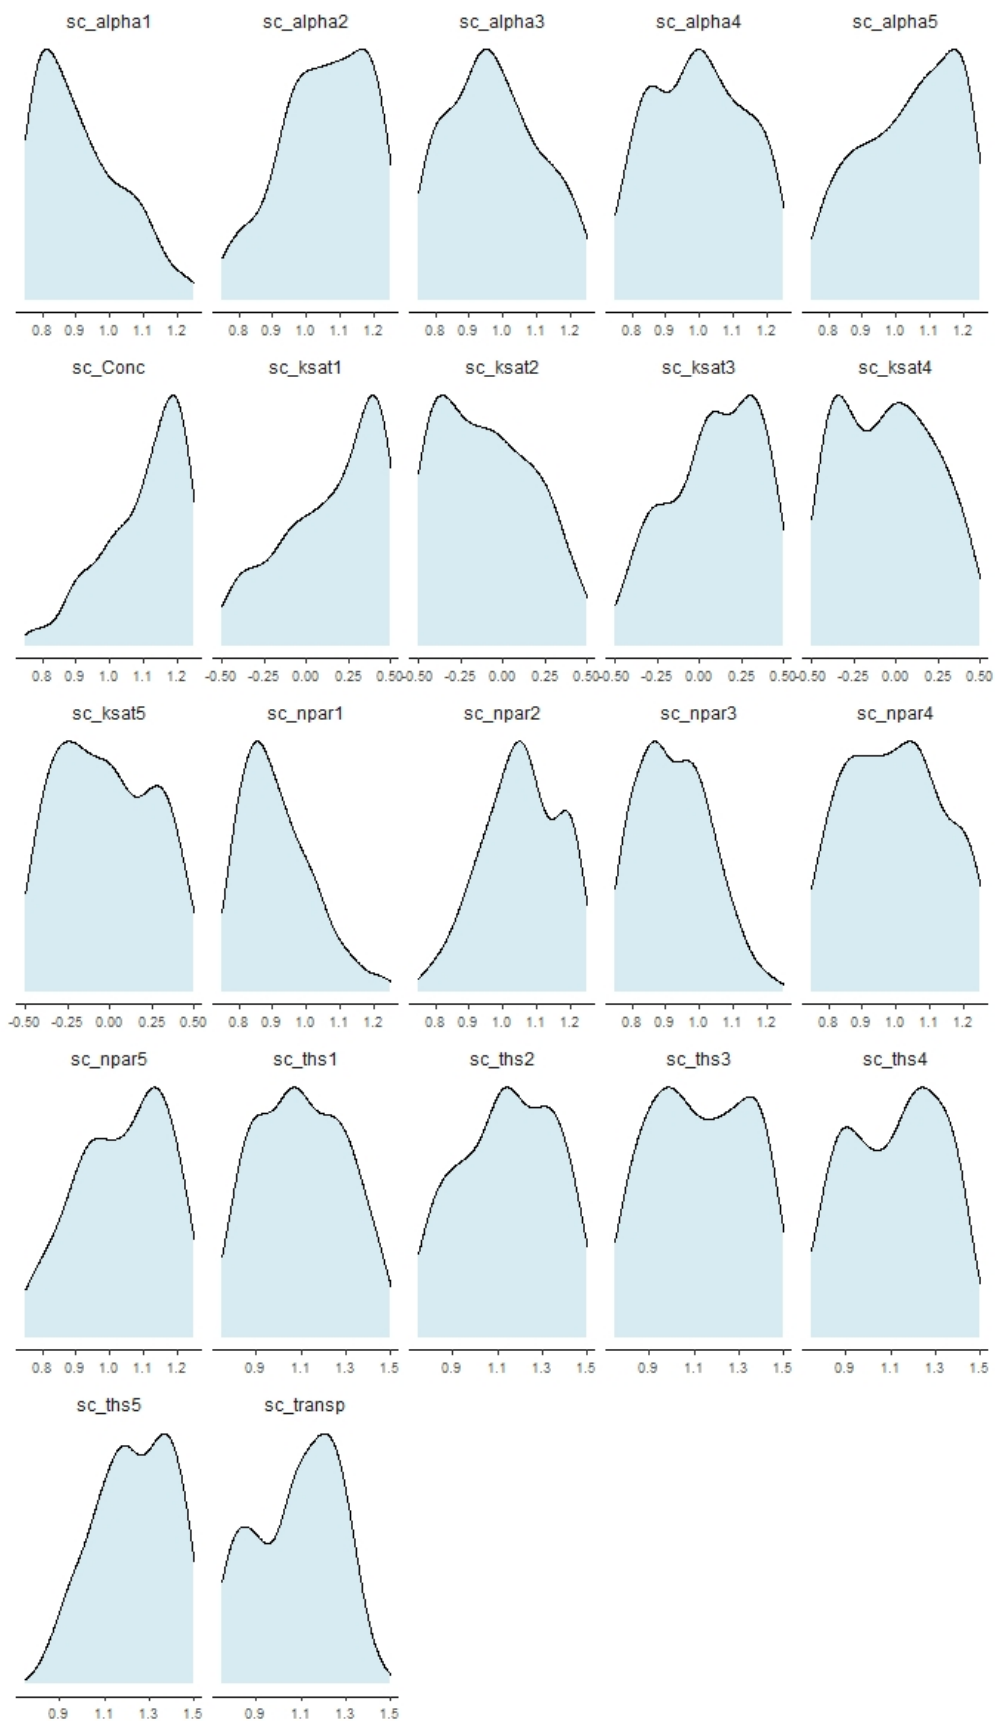

Fig. S3: posterior density distributions of the scaling factors used in the calibration of model ST3. Numbers indicate the individual model layers. Range of x-axes corresponds to prior distribution.

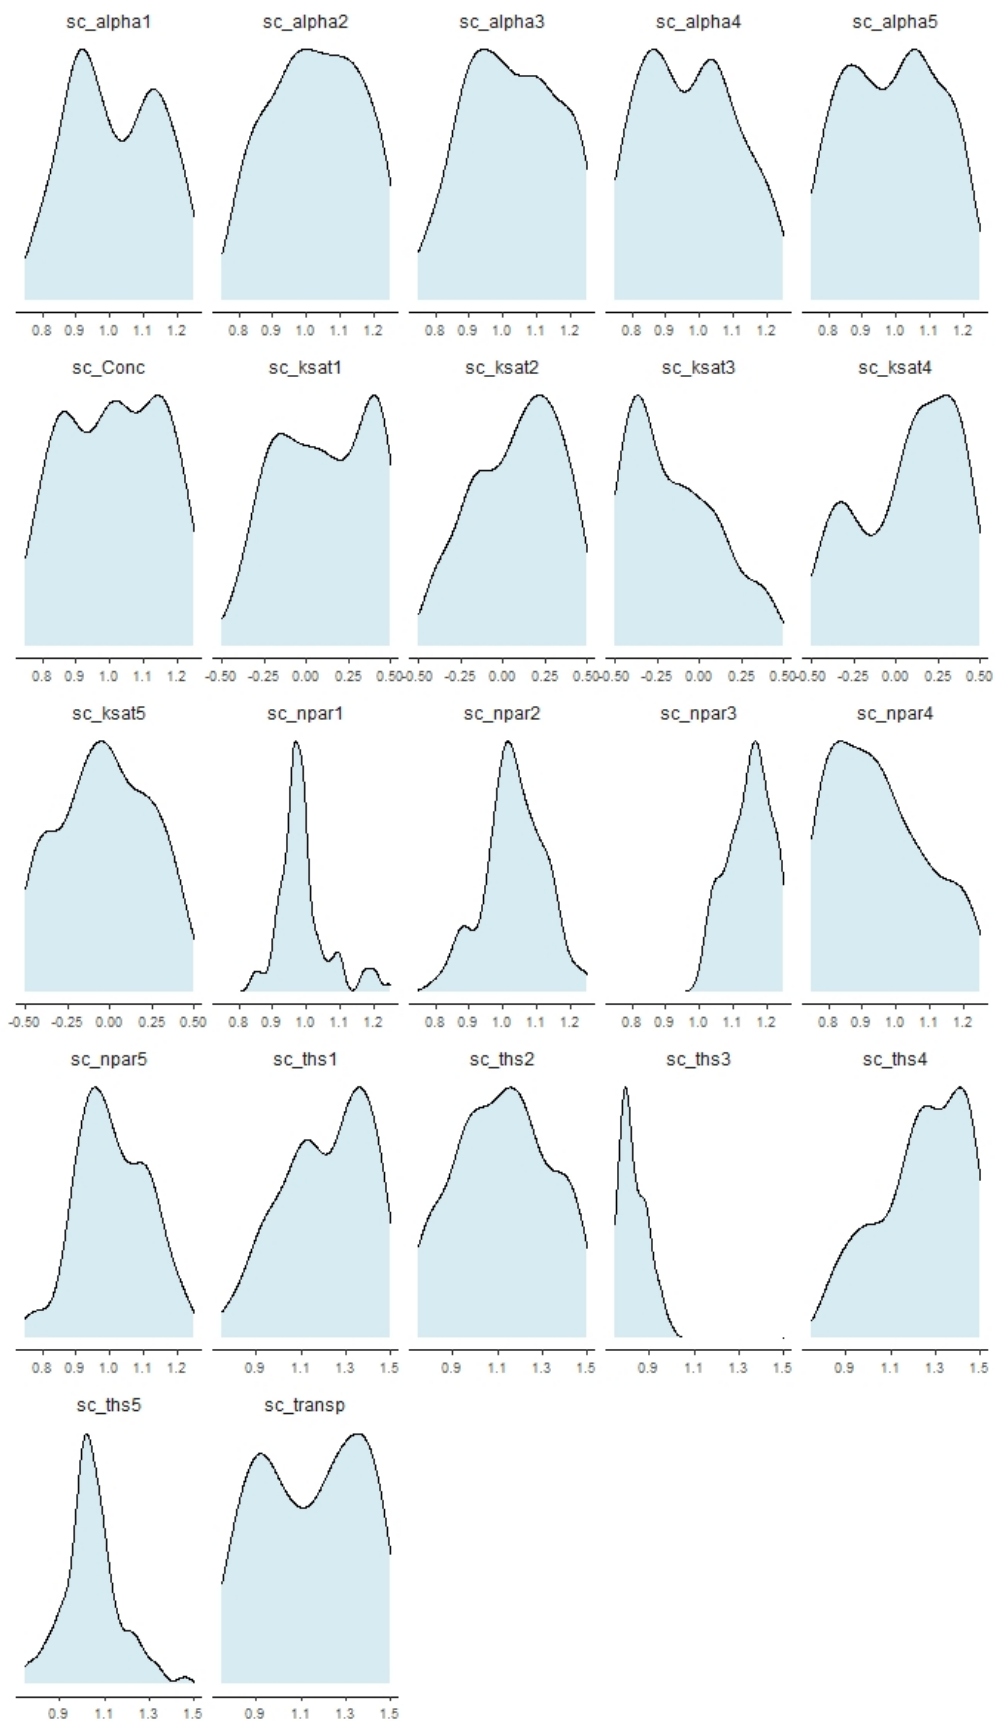

Fig. S4: posterior density distributions of the scaling factors used in the calibration of model WL1. Numbers indicate the individual model layers. Range of x-axes corresponds to prior distribution.

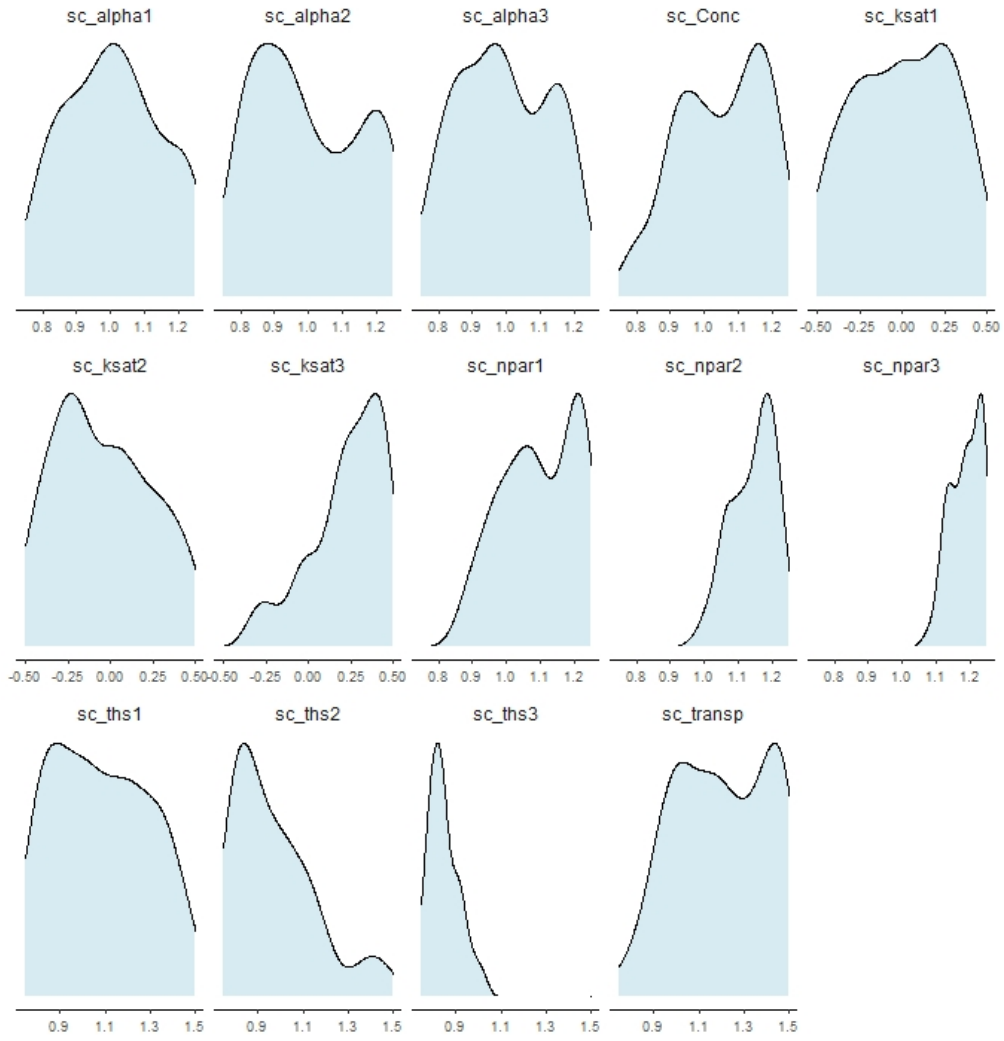

Fig. S5: posterior density distributions of the scaling factors used in the calibration of model WL2. Numbers indicate the individual model layers. Range of x-axes corresponds to prior distribution.

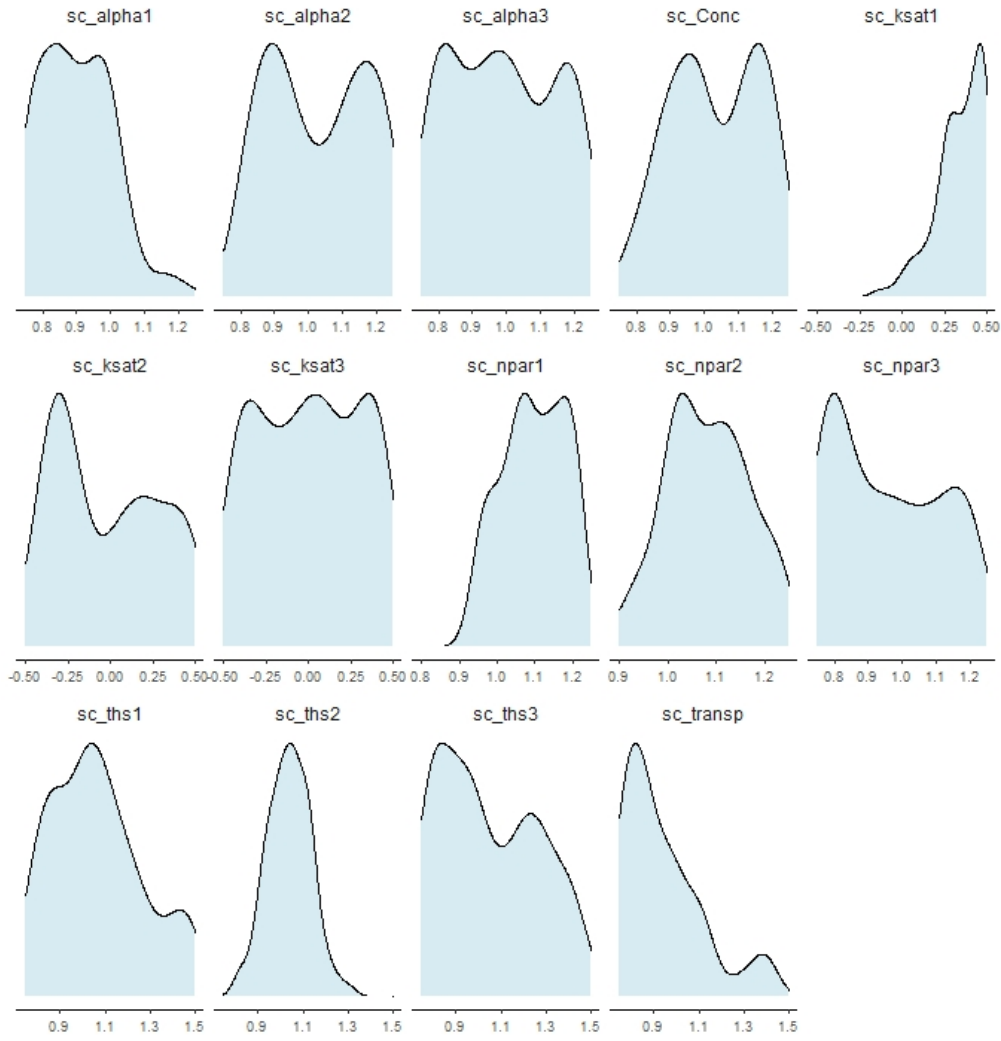

Fig. S6: posterior density distributions of the scaling factors used in the calibration of model WL3. Numbers indicate the individual model layers. Range of x-axes corresponds to prior distribution.
